# Supplementary material
Source: Elsevier journal article supplement (https://www.sciencedirect.com/science/article/pii/S1136103422000181)
Supplement: mmc1 [file S1136103422000181:mmc1.docx]

**Accepted studies and meta-analyses in the adaptation of the DIME model**

***Path 1. Direct Effect of Prior Knowledge on Inferential Ability***

Table 1 shows the only study that supports path 1. Table 2 shows the results of the meta-analysis carried out with the correlational studies that provide additional evidences. Egger's test indicates that there is no reason to think that these results are conditioned by a possible publication bias (*T-test* = -1.8; *p* > .05).

**Table 1**

Selected intervention studies in Path 1

| Study | *g* | LCI | HCI |
| --- | --- | --- | --- |
| Pascual y Goikoetxea (2014). Study I | 0.97 | 0.3 | 1.64 |

*Note.* LCI = low estimate confidence interval, HCI = high estimate confidence interval.

**Table 2**

Forest plot of selected correlational studies in Path 1

| Study | *r* | SE | % | LCI | HCI |  |
| --- | --- | --- | --- | --- | --- | --- |
| Barreyro et al. (2017) | 0.37 | 0.08 | 9.84 | 0.23 | 0.49 |
| García et al. (2015). Study I | 0.32 | 0.07 | 10.35 | 0.19 | 0.44 |
| García et al. (2015). Study II | 0.39 | 0.08 | 9.64 | 0.25 | 0.52 |
| García et al. (2019) | 0.44 | 0.05 | 11.52 | 0.36 | 0.51 |
| Sánchez et al. (2002) | 0.41 | 0.07 | 10.06 | 0.28 | 0.52 |
| Sánchez et al. (2007). With rhetorical devices | 0.32 | 0.12 | 7.74 | 0.11 | 0.51 |
| Sánchez et al. (2007). Without rhetorical devices | 0.42 | 0.12 | 7.74 | 0.21 | 0.59 |
| Sánchez et al. (2017) | 0.69 | 0.07 | 10.14 | 0.61 | 0.76 |
| Sánchez y García (2009) | 0.56 | 0.07 | 10.06 | 0.45 | 0.65 |
| Sanjosé et al. (2010). Study I (1) | 0.17 | 0.20 | 4.39 | -0.22 | 0.51 |
| Sanjosé et al. (2010 Study I (2) | 0.26 | 0.22 | 3.90 | -0.16 | 0.60 |
| Sanjosé et al. (2010). Study II | 0.24 | 0.19 | 4.61 | -0.13 | 0.55 |
| Total | 0.42 | 0.05 | 100 | 0.33 | 0.50 |
| Heterogeneity: = 0.02; *Q* = 43.46; *df* = 11 (*p* < 0.05); *I2*= 74.7% | | | | | |
| One-tailed test null hypothesis *Z* = 8.7 (*p* < 0.05) | | | | | |

*Note.* SE = standard error, %: weight to the studies, LCI = low estimate confidence interval, HCI = high estimate confidence interval.

***Path 2. Direct Effect of Comprehension Strategies on Reading Comprehension***

Table 3 shows the results of the meta-analysis carried out with the intervention studies that support path 2. Egger's test indicates that these results may be conditioned by a possible publication bias (*T-test* = 4.15; *p* < .05). Table 4 shows the results of the meta-analysis carried out with the correlational studies that support the evidences of the intervention studies. Egger's test indicates that these results may be conditioned by a possible publication bias (*T-test* = 3.1; *p* < .05).

**Table 3**

Forest plot of selected intervention studies on Path 2

| Study | *g* | SE | % | LCI | HCI |  |
| --- | --- | --- | --- | --- | --- | --- |
| Alva et al. (2010) | 0.57 | 0.26 | 2.53 | 0.06 | 1.07 |
| Angulo (2018) | 0.45 | 0.23 | 2.58 | 0.00 | 0.91 |
| Ariza y Bonilla (2014) | 1.46 | 0.27 | 2.51 | 0.93 | 1.98 |
| Benítez, Barajas et al. (2014) | 0.72 | 0.23 | 2.59 | 0.27 | 1.16 |
| Benítez, Ramírez et al. (2014) | 0.35 | 0.27 | 2.51 | -0.17 | 0.88 |
| Briones (2018) | 1.88 | 0.18 | 2.68 | 1.53 | 2.24 |
| Broncano y Chávez (2015) | 3.51 | 0.44 | 2.08 | 2.64 | 4.38 |
| Cabanillas (2004) | 0.90 | 0.32 | 2.39 | 0.28 | 1.53 |
| Carriedo y Alonso-Tapia (1996). Grade 8 | 0.83 | 0.13 | 2.75 | 0.56 | 1.09 |
| Carriedo y Alonso-Tapia (1996). Grade 6 | -0.21 | 0.14 | 2.74 | -0.49 | 0.08 |
| Enciso (2017) | 0.88 | 0.27 | 2.51 | 0.36 | 1.41 |
| González, A (1992). Study I | 0.08 | 0.27 | 2.50 | -0.45 | 0.61 |
| Laguna y Trujillo (2014) | 1.61 | 0.34 | 2.34 | 0.94 | 2.28 |
| Malvas y Rodríguez (2014) | 2.71 | 0.38 | 2.24 | 1.97 | 3.45 |
| Manrique (2019) | 3.72 | 0.45 | 2.06 | 2.84 | 4.61 |
| Márquez (2014) | 1.31 | 0.31 | 2.42 | 0.70 | 1.91 |
| Martín-Antón et al. (2013). Study II. Grade 8 | 0.75 | 0.18 | 2.69 | 0.41 | 1.10 |
| Martín-Antón et al. (2013). Study III. Grade 10 | 1.30 | 0.22 | 2.61 | 0.87 | 1.74 |
| Martínez et al. (2015) | 2.45 | 0.33 | 2.36 | 1.80 | 3.11 |
| Mateos (1991) | -0.63 | 0.36 | 2.28 | -1.35 | 0.08 |
| Meza (2004) | 0.96 | 0.26 | 2.52 | 0.44 | 1.47 |
| Montanero y González (2003) | 1.33 | 0.34 | 2.34 | 0.66 | 1.99 |
| Narváez y Zúñiga (2012) | 0.87 | 0.32 | 2.39 | 0.25 | 1.49 |
| Nunura (2018) | 1.40 | 0.22 | 2.60 | 0.97 | 1.84 |
| Pérez (1990) | 0.39 | 0.41 | 2.15 | -0.42 | 1.20 |
| Pizarro (2008) | 0.62 | 0.14 | 2.74 | 0.34 | 0.89 |
| Rodríguez et al. (2016) | 0.63 | 0.31 | 2.42 | 0.03 | 1.23 |
| Salazar y Vélez (2017) | 1.84 | 0.37 | 2.27 | 1.11 | 2.56 |
| Salinas (2010) | 1.03 | 0.30 | 2.43 | 0.44 | 1.62 |
| Sánchez (2019) | 0.99 | 0.26 | 2.52 | 0.47 | 1.50 |
| Tapia (2017) | 3.73 | 0.55 | 1.82 | 2.66 | 4.81 |
| Torres (2007) | 1.58 | 0.26 | 2.52 | 1.07 | 2.10 |
| Ugaz (2019) | 2.25 | 0.36 | 2.30 | 1.56 | 2.95 |
| Ureta (2018) | 2.46 | 0.34 | 2.34 | 1.80 | 3.12 |
| Vásquez (2016) | 1.38 | 0.34 | 2.35 | 0.72 | 2.04 |
| Vega et al. (2014) | 0.65 | 0.28 | 2.49 | 0.11 | 1.19 |
| Vidal-Abarca (1990) | 0.66 | 0.25 | 2.54 | 0.17 | 1.15 |
| Vidal-Abarca et al. (2014) | 0.69 | 0.40 | 2.19 | -0.09 | 1.47 |
| Vidal-Abarca y Gilabert (1995). Study I | 0.17 | 0.21 | 2.62 | -0.25 | 0.58 |
| Vidal-Abarca y Gilabert (1995). Study III | 0.20 | 0.24 | 2.56 | -0.27 | 0.67 |
| Zárate (2006) | 1.28 | 0.26 | 2.52 | 0.77 | 1.79 |
| Total | 1.16 | 0.12 | 100 | 0.92 | 1.41 |
| Heterogeneity: = 0.54; *Q* = 373.5; *df* = 40 ( *p* < 0.05); *I2* = 89.5% | | | | | |
| One-tailed test null hypothesis Z = 9.4 (*p* < 0.05) | | | | | |

*Note.* SE = standard error, %: weight to the studies, LCI = low estimate confidence interval, HCI = high estimate confidence interval.

**Table 4**

Forest plot of selected correlational studies in Path 2

| Study | *r* | SE | % | LCI | HCI |  |
| --- | --- | --- | --- | --- | --- | --- |
| Almazán (2018) | 0.05 | 0.11 | 3.44 | -0.17 | 0.26 |
| Arciniega (2018) | 0.13 | 0.08 | 3.74 | -0.02 | 0.27 |
| Ataucuri y Rojas (2018) | 0.84 | 0.11 | 3.47 | 0.77 | 0.89 |
| Blasco y Allueva (2010) | 0.29 | 0.10 | 3.50 | 0.10 | 0.47 |
| Cabrera (2014). Study I | 0.23 | 0.05 | 3.90 | 0.13 | 0.32 |
| Calderón et al. (2013) | 0.58 | 0.10 | 3.51 | 0.43 | 0.70 |
| Cano, García, Berbén et al. (2014) | 0.12 | 0.04 | 3.96 | 0.04 | 0.20 |
| Cano, García, Justicia et al. (2014) | 0.22 | 0.05 | 3.93 | 0.13 | 0.30 |
| Carriedo y Alonso-Tapia (1996) | 0.28 | 0.04 | 3.96 | 0.21 | 0.35 |
| Cerrón y Pineda (2014) | 0.84 | 0.11 | 3.47 | 0.77 | 0.89 |
| del Pozo (2018) | 0.42 | 0.10 | 3.52 | 0.24 | 0.57 |
| Doguis (2001) | 0.77 | 0.19 | 2.70 | 0.57 | 0.88 |
| Domínguez (2015) | 0.60 | 0.26 | 2.06 | 0.19 | 0.84 |
| Flores-Carrasco et al. (2017) | 0.46 | 0.14 | 3.17 | 0.22 | 0.65 |
| García (2013) | 0.54 | 0.17 | 2.84 | 0.26 | 0.74 |
| González, M (1992). Study I | 0.40 | 0.20 | 2.52 | 0.02 | 0.68 |
| Guerra y Guevara (2017) | 0.11 | 0.04 | 3.95 | 0.03 | 0.19 |
| Jiménez et al. (2009) | 0.14 | 0.04 | 3.97 | 0.07 | 0.21 |
| López et al. (2014) | 0.76 | 0.16 | 2.91 | 0.59 | 0.87 |
| Mañá et al. (2009) | 0.32 | 0.16 | 2.91 | 0.01 | 0.57 |
| Mateos (1991) | -0.08 | 0.15 | 3.05 | -0.36 | 0.21 |
| Mengual (2017) | 0.33 | 0.04 | 3.95 | 0.25 | 0.40 |
| Morales et al. (2008) | -0.19 | 0.06 | 3.87 | -0.29 | -0.08 |
| Paba y González (2014) | 0.15 | 0.16 | 2.91 | -0.17 | 0.44 |
| Pashanasi (2019) | 0.79 | 0.24 | 2.18 | 0.53 | 0.91 |
| Rello et al. (2018) | 0.21 | 0.08 | 3.68 | 0.05 | 0.36 |
| Soto, Gutiérrez, Jacovina et al. (2019). Study I | 0.13 | 0.07 | 3.76 | -0.01 | 0.27 |
| Soto, Gutiérrez, Jacovina et al. (2019). Study II | 0.64 | 0.11 | 3.45 | 0.50 | 0.75 |
| Soto et al. (2020) | 0.47 | 0.08 | 3.68 | 0.33 | 0.59 |
| Vidal-Abarca et al. (2010) | 0.68 | 0.26 | 2.06 | 0.31 | 0.87 |
| Total | 0.39 | 0.05 | 100 | 0.30 | 0.48 |
| Heterogeneity: = 0.07; *Q* = 392.3; *df* = 29 (*p* < 0.05); *I2*= 92.6% | | | | | |
| One-tailed test null hypothesis *Z* = 7.9 (*p* < 0.05) | | | | | |

*Note.* SE = standard error, %: weight to the studies, LCI = low estimate confidence interval, HCI = high estimate confidence interval.

***Path 3. Direct Effect of Comprehension Strategies on Inferential Ability***

Table 5 shows the only study that supports path 3. Table 6 shows the results of the meta-analysis that is carried out with the correlational studies that provide additional evidence. Egger's test indicates that there is no reason to think that these results are conditioned by a possible publication bias (*T-test* = -1.8; *p* > .05).

**Table 5**

Selected intervention studies in Path 3

| Study | *g* | LCI | HCI |
| --- | --- | --- | --- |
| Flores y Montes (2015) | 0.99 | 0.39 | 1.59 |

*Note.* LCI = low estimate confidence interval, HCI = high estimate confidence interval.

**Table 6**

Forest plot of selected correlational studies in Path 3

| Study | *R* | SE | % | LCI | HCI |  |
| --- | --- | --- | --- | --- | --- | --- |
| Soto, Gutiérrez, Rodríguez et al. (2019). Low performance | 0.05 | 0.15 | 28.73 | -0.23 | 0.33 |
| Soto, Gutiérrez, Rodríguez et al. (2019). High performance | 0.06 | 0.17 | 21.67 | -0.27 | 0.38 |
| Sanjosé et al. (2010). Study I (1) | 0.27 | 0.20 | 16.96 | -0.12 | 0.58 |
| Sanjosé et al. (2010). Study I (2) | 0.44 | 0.22 | 14.48 | 0.05 | 0.72 |
| Sanjosé et al. (2010). Study II | 0.38 | 0.19 | 18.16 | 0.03 | 0.65 |
| Total | 0.21 | 0.09 | 100 | 0.05 | 0.37 |
| Heterogeneity: = 0.0046; *Q* = 4.5; *df* = 4 (*p* > 0.05); *I2* = 12% | | | | | |
| One-tailed test null hypothesis *Z* = 2.5 (*p* < 0.05) | | | | | |

*Note.* SE = standard error, %: weight to the studies, LCI = low estimate confidence interval, HCI = high estimate confidence interval.

***Path 4. Direct Effect of Vocabulary on Reading Comprehension***

Table 7 shows the only study that supports path 4. Table 8 shows the results of the meta-analysis carried out with the correlational studies that provide additional evidences. Egger's test indicates that there is no reason to think that these results are conditioned by a possible publication bias (*T-test* = 0.92; *p* > .05).

**Table 7**

Selected intervention studies in Path 4

| Study | *g* | LCI | HCI |
| --- | --- | --- | --- |
| Arbaiza et al. (2012) | 0.49 | -0.41 | 1.2 |

*Note.* LCI = low estimate confidence interval, HCI = high estimate confidence interval.

**Table 8**

Forest plot of selected correlational studies in Path 4

| Study | *r* | SE | % | LCI | HCI |  |
| --- | --- | --- | --- | --- | --- | --- |
| Aguilera-Jiménez et al. (2013) | 0.61 | 0.17 | 3.53 | 0.36 | 0.78 |
| Almazán (2018) | 0.67 | 0.11 | 5.36 | 0.53 | 0.77 |
| Calet et al. (2019) | 0.46 | 0.09 | 6.32 | 0.32 | 0.58 |
| Carriedo y Alonso-Tapia (1996) | 0.33 | 0.04 | 7.93 | 0.26 | 0.40 |
| Chino y Zegarra-Valdivia (2019) | 0.30 | 0.08 | 6.45 | 0.14 | 0.44 |
| Craig et al. (2020) | 0.38 | 0.04 | 7.82 | 0.30 | 0.45 |
| Demagistri (2016). Grade 7 | 0.72 | 0.13 | 4.63 | 0.57 | 0.82 |
| Demagistri (2016). Grade 9 | 0.51 | 0.13 | 4.67 | 0.30 | 0.68 |
| Demagistri (2016). Grade 11 | 0.32 | 0.13 | 4.71 | 0.08 | 0.53 |
| Demagistri et al. (2014) | 0.42 | 0.10 | 5.79 | 0.25 | 0.57 |
| Medina (2001) | 0.43 | 0.17 | 3.53 | 0.12 | 0.66 |
| Morales et al. (2008) | 0.40 | 0.06 | 7.42 | 0.30 | 0.49 |
| Morales et al. (2011) | 0.36 | 0.06 | 7.48 | 0.26 | 0.45 |
| Núñez (2017) | 0.69 | 0.12 | 4.98 | 0.55 | 0.80 |
| Riffo et al. (2014) | 0.20 | 0.19 | 3.21 | -0.16 | 0.51 |
| Suárez et al. (2010) | 0.54 | 0.02 | 8.48 | 0.52 | 0.56 |
| Testa (2009) | 0.51 | 0.24 | 2.22 | 0.09 | 0.78 |
| Thorne et al. (2013) | 0.34 | 0.11 | 5.46 | 0.14 | 0.51 |
| Total | 0.46 | 0.04 | 100 | 0.39 | 0.52 |
| Heterogeneity: = 0.02; *Q* = 100.6; *df* = 17 (*p* < 0.05); *I2* = 83.1% | | | | | |
| One-tailed test null hypothesis *Z* = 11.8 (*p* < 0.05) | | | | | |

*Note.* SE = standard error, %: weight to the studies, LCI = low estimate confidence interval, HCI = high estimate confidence interval.

***Path 5. Direct Effect of Inferential Ability on Reading Comprehension***

Table 9 shows the only study that supports path 5. Table 10 shows the results of the meta-analysis carried out with the correlational studies that support the evidence found. Egger's test indicates that there is no reason to think that these results are conditioned by possible publication bias (*T-test* = -0.82; *p* > .05).

**Table 9**

Selected intervention studies in Path 5

| Study | *g* | LCI | HCI |
| --- | --- | --- | --- |
| Aguirre y Loaiza (2015) | 0.47 | -0.12 | 1.06 |

*Note.* LCI = low estimate confidence interval, HCI = high estimate confidence interval.

**Table 10**

Forest plot of selected correlational studies in Path 5

| Study | *r* | SE | % | LCI | HCI |  |
| --- | --- | --- | --- | --- | --- | --- |
| Calet et al. (2019) | 0.33 | 0.09 | 10.26 | 0.17 | 0.47 |
| Cerdán et al. (2010) | 0.49 | 0.17 | 5.20 | 0.19 | 0.71 |
| García et al. (2015). Study I. | 0.38 | 0.07 | 11.54 | 0.26 | 0.49 |
| García et al. (2015). Study II. | 0.37 | 0.08 | 10.57 | 0.22 | 0.50 |
| Sánchez et al. (2002) | 0.46 | 0.07 | 11.14 | 0.34 | 0.57 |
| Sánchez et al. (2007). With rhetorical devices | 0.44 | 0.12 | 8.14 | 0.24 | 0.60 |
| Sánchez et al. (2007). Without rhetorical devices | 0.39 | 0.12 | 8.14 | 0.18 | 0.56 |
| Sánchez et al. (2017) | 0.68 | 0.07 | 11.24 | 0.60 | 0.75 |
| Sánchez y García (2009) | 0.46 | 0.07 | 11.14 | 0.34 | 0.57 |
| Sanjosé et al. (2010). Study I (1) | 0.40 | 0.20 | 4.30 | 0.03 | 0.67 |
| Sanjosé et al. (2010). Study I (2) | 0.29 | 0.22 | 3.79 | -0.13 | 0.62 |
| Sanjosé et al. (2010). Study II | 0.38 | 0.19 | 4.54 | 0.02 | 0.65 |
| Total | 0.44 | 0.05 | 100 | 0.36 | 0.52 |
| Heterogeneity: = 0.016; *Q* = 29.6; *d f* = 11 (*p* < 0.05); *I2* = 62.9% | | | | | |
| One-tailed test null hypothesis *Z* = 9.6 (*p* < 0.05) | | | | | |

*Note.* SE = standard error, %: weight to the studies, LCI = low estimate confidence interval, HCI = high estimate confidence interval.

***Path 6. Correlation between Prior Knowledge and Reading Comprehension***

Table 11 shows the only selected intervention study. Path 6 is represented as bidirectional since the effect size of that study is not significant and not substantially important either. Table 12 shows the results of the meta-analysis carried out with the correlational studies. Egger's test suggests that there is no reason to think that these results are conditioned by possible publication bias (*T-test* = -0.31; *p* > .05).

**Table 11**

Selected intervention studies in Path 6

| Study | *g* | LCI | HCI |
| --- | --- | --- | --- |
| Pascual y Goikoetxea (2014). Study I | -0.61 | -1.25 | 0.04 |

*Note.* LCI = low estimate confidence interval, HCI = high estimate confidence interval.

**Table 12**

Forest plot of selected correlational studies in Path 6

| Study | *r* | SE | % | LCI | HCI |  |
| --- | --- | --- | --- | --- | --- | --- |
| Cano et al. (2014) | 0.47 | 0.05 | 8.23 | 0.39 | 0.54 |
| García et al. (2015). Study I | 0.38 | 0.07 | 7.66 | 0.26 | 0.49 |
| García et al. (2015). Study II | 0.53 | 0.08 | 7.28 | 0.41 | 0.64 |
| Martínez (2012). Study II | 0.59 | 0.13 | 5.74 | 0.40 | 0.73 |
| Mateos et al. (2016) | 0.18 | 0.05 | 8.26 | 0.09 | 0.27 |
| Montanero y León (2004a) | 0.48 | 0.14 | 5.48 | 0.25 | 0.66 |
| Montanero y León (2004b). Grade 11 | 0.44 | 0.15 | 5.03 | 0.17 | 0.65 |
| Montanero y León (2004b). Grade 8 | 0.54 | 0.10 | 6.56 | 0.38 | 0.67 |
| Montanero y León (2004b). Undergraduate | 0.17 | 0.10 | 6.63 | -0.03 | 0.36 |
| Pérez (2013) | 0.09 | 0.19 | 4.22 | -0.27 | 0.42 |
| Sánchez et al. (2002) | 0.59 | 0.07 | 7.51 | 0.49 | 0.68 |
| Sánchez et al. (2007). With rhetorical devices | 0.41 | 0.12 | 6.18 | 0.21 | 0.58 |
| Sánchez et al. (2007). Without rhetorical devices | 0.45 | 0.12 | 6.18 | 0.25 | 0.61 |
| Sánchez et al. (2017) | 0.62 | 0.07 | 7.55 | 0.52 | 0.70 |
| Sánchez y García (2009) | 0.39 | 0.07 | 7.51 | 0.26 | 0.51 |
| Total | 0.44 | 0.05 | 100 | 0.35 | 0.52 |
| Heterogeneity: = 0.03; *Q* = 80; *df* = 14 (*p* < 0.05); *I2*= 82.5% | | | | | |
| One-tailed test null hypothesis *Z* = 8.9 (*p* < 0.05) | | | | | |

*Note.* SE = standard error, %: weight to the studies, LCI = low estimate confidence interval, HCI = high estimate confidence interval.

***Path 7. Correlation between Decoding and Reading Comprehension***

Table 13 shows the only selected intervention study. Path 7 is represented as bidirectional since the effect size of that study is not significant and not substantially important either. The results of the meta-analysis carried out with the correlational studies are presented in detail in Table 14. Egger's test indicates that there are no reasons to think that these results are conditioned by a possible publication bias (*T-test* = 1.1; *p* > .05).

**Table 13**

Selected intervention studies in Path 7

| Study | *g* | LCI | HCI |
| --- | --- | --- | --- |
| Calet et al. (2017) | -0.07 | -0.75 | 0.62 |

*Note.* LCI = low estimate confidence interval, HCI = high estimate confidence interval.

**Table 14**

Forest plot of selected correlational studies in Path 7

| Study | *r* | SE | % | LCI | HCI |  |
| --- | --- | --- | --- | --- | --- | --- |
| Aguilera-Jiménez et al. (2013) | 0.44 | 0.17 | 1.53 | 0.14 | 0.67 |
| Amiama-Espaillat y Mayor-Ruiz (2018) | 0.39 | 0.05 | 6.01 | 0.30 | 0.47 |
| Aran-Filippetti y López (2016) | 0.20 | 0.08 | 4.37 | 0.05 | 0.34 |
| Balbi et al. (2009) | 0.40 | 0.06 | 5.58 | 0.30 | 0.49 |
| Calet et al. (2015) | 0.40 | 0.15 | 1.91 | 0.13 | 0.61 |
| Calet et al. (2019) | 0.24 | 0.09 | 3.96 | 0.08 | 0.39 |
| Craig et al. (2020) | 0.19 | 0.04 | 6.46 | 0.10 | 0.27 |
| Cuadro et al. (2017) | 0.37 | 0.02 | 7.95 | 0.33 | 0.40 |
| Demagistri (2016). Grade 7 | 0.63 | 0.13 | 2.28 | 0.44 | 0.76 |
| Demagistri (2016). Grade 9 | 0.57 | 0.13 | 2.31 | 0.37 | 0.72 |
| Demagistri (2016). Grade 11 | 0.33 | 0.13 | 2.34 | 0.08 | 0.53 |
| Elosúa et al. (2012) | 0.47 | 0.15 | 1.81 | 0.20 | 0.67 |
| Fumagalli et al. (2017) | 0.37 | 0.13 | 2.22 | 0.12 | 0.57 |
| García et al. (2015). Study I. | 0.35 | 0.07 | 4.88 | 0.23 | 0.46 |
| García et al. (2015). Study II. | 0.21 | 0.08 | 4.17 | 0.05 | 0.36 |
| González-Trujillo et al. (2014) | 0.49 | 0.15 | 1.91 | 0.24 | 0.68 |
| Iglesias-Sarmiento et al. (2015) | 0.19 | 0.15 | 1.94 | -0.10 | 0.45 |
| Infante et al. (2012) | 0.33 | 0.12 | 2.61 | 0.11 | 0.52 |
| León-Islas et al. (2018) | 0.04 | 0.19 | 1.26 | -0.32 | 0.40 |
| Morales et al. (2008) | 0.35 | 0.06 | 5.65 | 0.25 | 0.44 |
| Morales et al. (2011) | 0.26 | 0.06 | 5.75 | 0.16 | 0.36 |
| Recio y León (2015) | 0.45 | 0.24 | 0.84 | 0.01 | 0.74 |
| Sánchez et al. (2002) | 0.42 | 0.07 | 4.58 | 0.29 | 0.53 |
| Sánchez et al. (2007). With rhetorical devices | 0.35 | 0.12 | 2.74 | 0.14 | 0.54 |
| Sánchez et al. (2007). Without rhetorical devices | 0.45 | 0.12 | 2.74 | 0.25 | 0.61 |
| Sánchez et al. (2017) | 0.50 | 0.07 | 4.66 | 0.39 | 0.60 |
| Sánchez y García (2009) | 0.42 | 0.07 | 4.58 | 0.29 | 0.53 |
| Zevallos et al. (2017) | 0.31 | 0.11 | 2.98 | 0.11 | 0.49 |
| Total | 0.36 | 0.02 | 100 | 0.32 | 0.40 |
| Heterogeneity: = 0.006; *Q* = 60.2; *df* = 27 (*p* < 0.05); *I2* = 55.1% | | | | | |
| One-tailed test null hypothesis *Z* = 15.9 (*p* < 0.05) | | | | | |

*Note.* SE = standard error, %: weight to the studies, LCI = low estimate confidence interval, HCI = high estimate confidence interval.

***Path 8. Correlation between Comprehension Strategies and Prior Knowledge***

Table 15 shows the results of the meta-analysis carried out with the selected intervention studies. This relationship is represented as bidirectional since the size of the effect obtained in this meta-analysis is not significant and not substantially important either. The only correlation study that provides evidence for path 8 is shown in table 16.

**Table 15**

Forest plot of selected intervention studies on Path 8

| Study | *g* | SE | % | LCI | HCI |  |
| --- | --- | --- | --- | --- | --- | --- |
| Martínez et al. (2015). High knowledge | -0.15 | 0.47 | 27.87 | -1.07 | 0.78 |
| Martínez et al. (2015). Low knowledge | 0.97 | 0.50 | 25.84 | -0.01 | 1.95 |
| Montanero y González (2003) | 0.05 | 0.31 | 46.29 | -0.56 | 0.65 |
| Total | 0.23 | 0.30 | 100 | -0.36 | 0.82 |
| Heterogeneity: = 0.1; *Q* = 3.16; *df* = 2 (*p* > 0.05); *I2* = 36.8% | | | | | |
| One-tailed test null hypothesis *Z* = 0.76 (*p* > 0.05) | | | | | |

*Note.* SE = standard error, %: weight to the studies, LCI = low estimate confidence interval, HCI = high estimate confidence interval.

**Table 16**

Selected correlational studies on Path 8

| Study | *r* | LCI | HCI |
| --- | --- | --- | --- |
| Cano, García, Justicia et al. (2014) | 0.2 | 0.11 | 0.29 |

*Note.* LCI = low estimate confidence interval, HCI = high estimate confidence interval.

***Path 9. Correlation between Vocabulary and Inferential Ability***

Table 17 shows the results of the meta-analysis carried out with the correlational studies that support path 9.

**Table 17**

Forest plot of selected correlational studies in Path 9

| Study | *R* | SE | % | LCI | HCI |  |
| --- | --- | --- | --- | --- | --- | --- |
| Calet et al. (2019) | 0.31 | 0.09 | 22.22 | 0.15 | 0.45 |
| Soto, Gutiérrez, Rodríguez et al. (2019). High performance | 0.76 | 0.17 | 18.21 | 0.58 | 0.87 |
| Soto, Gutiérrez, Rodríguez et al. (2019). Low performance | 0.21 | 0.15 | 19.52 | -0.08 | 0.46 |
| Vieiro y Amboage (2016) | 0.23 | 0.17 | 18.58 | -0.09 | 0.51 |
| Villalonga (2012) | 0.68 | 0.10 | 21.47 | 0.55 | 0.77 |
| Total | 0.47 | 0.15 | 100 | 0.21 | 0.67 |
| Heterogeneity: = 0.1; *Q* = 28.3; *df* = 4 (*p* < 0.05); *I2* = 85.9% | | | | | |
| One-tailed test null hypothesis *Z* = 3.4 (*p* < 0.05) | | | | | |

*Note.* SE = standard error, %: weight to the studies, LCI = low estimate confidence interval, HCI = high estimate confidence interval.

***Path 10. Correlation between Decoding and Vocabulary***

Table 18 shows the results of the meta-analysis carried out with the correlational studies that support path 10.

**Table 18**

Forest plot of selected correlational studies in Path 10

| Study | *r* | SE | % | LCI | HCI |  |
| --- | --- | --- | --- | --- | --- | --- |
| Aguilera-Jiménez et al. (2013) | 0.53 | 0.17 | 2.29 | 0.25 | 0.73 |
| Calet et al. (2016) | 0.24 | 0.11 | 5.99 | 0.04 | 0.42 |
| Calet et al. (2019) | 0.11 | 0.09 | 9.15 | -0.06 | 0.27 |
| Craig et al. (2020) | 0.07 | 0.04 | 33.49 | -0.02 | 0.16 |
| Morales et al. (2008) | 0.22 | 0.06 | 20.91 | 0.11 | 0.32 |
| Morales et al. (2011) | 0.13 | 0.06 | 22.06 | 0.02 | 0.23 |
| Villalonga (2012) | 0.82 | 0.10 | 6.12 | 0.74 | 0.88 |
| Total | 0.33 | 0.11 | 100 | 0.12 | 0.52 |
| Heterogeneity: = 0.08; *Q* = 100.9; *df* = 6 (*p* < 0.05); *I2* = 94.05% | | | | | |
| One-tailed test null hypothesis *Z* = 3.04 (*p* < 0.05) | | | | | |

*Note.* SE = standard error, %: weight to the studies, LCI = low estimate confidence interval, HCI = high estimate confidence interval.

***Path 11. Correlation between Decoding and Prior Knowledge***

Table 19 shows the results of the meta-analysis carried out with the correlational studies that support path 11.

**Table 19**

Forest plot of selected correlational studies in Path 11

| Study | *r* | SE | % | LCI | HCI |  |
| --- | --- | --- | --- | --- | --- | --- |
| García et al. (2015). Study I. | 0.27 | 0.07 | 14.23 | 0.14 | 0.39 |
| García et al. (2015). Study II. | 0.24 | 0.08 | 11.64 | 0.08 | 0.38 |
| García et al. (2019) | 0.44 | 0.05 | 20.47 | 0.36 | 0.51 |
| Sánchez et al. (2002) | 0.37 | 0.07 | 13.08 | 0.24 | 0.49 |
| Sánchez et al. (2007). With rhetorical devices | 0.37 | 0.12 | 7.06 | 0.16 | 0.55 |
| Sánchez et al. (2007). Without rhetorical devices | 0.28 | 0.12 | 7.06 | 0.06 | 0.48 |
| Sánchez et al. (2017) | 0.46 | 0.07 | 13.37 | 0.34 | 0.56 |
| Sánchez y García (2009) | 0.37 | 0.07 | 13.08 | 0.24 | 0.49 |
| Total | 0.36 | 0.04 | 100 | 0.30 | 0.42 |
| Heterogeneity: = 0.004; *Q* = 12; *df* = 7 (*p* > 0.05); *I2* = 41.6% | | | | | |
| One-tailed test null hypothesis *Z* = 10.8 (*p* < 0.05) | | | | | |

*Note.* SE = standard error, %: weight to the studies, LCI = low estimate confidence interval, HCI = high estimate confidence interval.

***Path 12. Correlation between Decoding and Inferential Ability***

Table 20 shows the results of the meta-analysis carried out with the correlational studies that support path 12.

**Table 20**

Forest plot of selected correlational studies in Path 12

| Study | *r* | SE | % | LCI | HCI |  |
| --- | --- | --- | --- | --- | --- | --- |
| Calet et al. (2019) | 0.16 | 0.09 | 7.55 | -0.01 | 0.32 |
| García et al. (2015). Study I. | 0.30 | 0.07 | 11.72 | 0.17 | 0.42 |
| García et al. (2015). Study II. | 0.13 | 0.08 | 8.33 | -0.03 | 0.28 |
| García et al. (2019) | 0.41 | 0.05 | 26.43 | 0.33 | 0.48 |
| Sánchez et al. (2002) | 0.28 | 0.07 | 10.11 | 0.14 | 0.41 |
| Sánchez et al. (2007). With rhetorical devices | 0.27 | 0.12 | 4.11 | 0.05 | 0.46 |
| Sánchez et al. (2007). Without rhetorical devices | 0.20 | 0.12 | 4.11 | -0.03 | 0.41 |
| Sánchez et al. (2017) | 0.50 | 0.07 | 10.49 | 0.39 | 0.60 |
| Sánchez y García (2009) | 0.30 | 0.07 | 10.11 | 0.16 | 0.43 |
| Vieiro y Amboage (2016) | 0.12 | 0.17 | 2.00 | -0.20 | 0.42 |
| Villalonga et al. (2014) | 0.60 | 0.10 | 5.05 | 0.45 | 0.71 |
| Total | 0.31 | 0.05 | 100 | 0.23 | 0.40 |
| Heterogeneity: = 0.018; *Q* = 38.5; *df* = 10 (*p* < 0.05); *I2* = 74% | | | | | |
| One-tailed test null hypothesis *Z* = 6.6 (*p* < 0.05) | | | | | |

*Note.* SE = standard error, %: weight to the studies, LCI = low estimate confidence interval, HCI = high estimate confidence interval.

***Path 13. Direct Effect of Comprehension Strategies on Vocabulary***

A unidirectional path from comprehension strategies to vocabulary cannot be proposed, since the pooled effect size is not significant and not substantially important either. Table 21 shows the results of the meta-analysis.

**Table 21**

Forest plot of selected intervention studies on Path 13

| Study | *g* | SE | % | LCI | HCI |  |
| --- | --- | --- | --- | --- | --- | --- |
| Carriedo y Alonso-Tapia (1996). Grade 8 | -0.17 | 0.13 | 36.36 | -0.42 | 0.08 |
| Carriedo y Alonso-Tapia (1996). Grade 6 | 0.30 | 0.14 | 34.19 | 0.01 | 0.58 |
| Carriedo y Alonso-Tapia (1996). Grade 7 | 0.22 | 0.18 | 29.44 | -0.13 | 0.58 |
| Total | 0.11 | 0.16 | 100 | -0.20 | 0.41 |
| Heterogeneity: = 0.05; *Q* = 6.6; *df* = 2 (*p* < 0.05); *I2* = 69.5% | | | | | |
| One-tailed test null hypothesis *Z* = 0.67 (*p* > 0.05) | | | | | |

*Note.* SE = standard error, %: weight to the studies, LCI = low estimate confidence interval, HCI = high estimate confidence interval.

***Path 14. Correlation between Vocabulary and Comprehension Strategies***

A bidirectional path between vocabulary and comprehension strategies cannot be proposed, since the pooled effect size is not significant. Table 22 shows the results of the meta-analysis.

**Table 22**

Forest plot of selected correlational studies in Path 14

| Study | *r* | SE | % | LCI | HCI |  |
| --- | --- | --- | --- | --- | --- | --- |
| Morales et al. (2008) | 0.12 | 0.06 | 47.9 | 0.01 | 0.23 |
| Soto, Gutiérrez, Rodríguez et al. (2019). High performance | 0.02 | 0.17 | 23.8 | -0.31 | 0.35 |
| Soto, Gutiérrez, Rodríguez et al. (2019). Low performance | -0.23 | 0.15 | 28.3 | -0.48 | 0.05 |
| Total | 0.00 | 0.11 | 100 | -0.22 | 0.21 |
| Heterogeneity: = 0.023; *Q* = 5.1; *df* = 2 (*p* > 0.05); *I2* = 61% | | | | | |
| One-tailed test null hypothesis *Z* = -0.03 (*p* > 0.05) | | | | | |

*Note.* SE = standard error, %: weight to the studies, LCI = low estimate confidence interval, HCI = high estimate confidence interval.

***Path 15. Correlation Between Decoding and Comprehension Strategies***

A bidirectional path between decoding and comprehension strategies cannot be established, since in the only admitted study the effect size is not significant. This study can be consulted in Table 23.

**Table 23**

Selected correlational studies on Path 15

| Study | *r* | LCI | HCI |
| --- | --- | --- | --- |
| Morales et al. (2008) | 0.05 | -0.06 | 0.16 |

*Note.* LCI = low estimate confidence interval, HCI = high estimate confidence interval.

**References**

Studies without an asterisk are those that are included in a single path.

*Aguilera-Jiménez, A., Delgado, C., Luque, A., Moreno-Pérez, F., Rodríguez-Ortiz, I., & Saldaña, D. (2013). Learning to read: the case of moroccan students who learn Spanish. *Spanish Journal of Psychology*, *16*(107), 1-9. <https://doi.org/10.1017/sjp.2013.109>

*Aguirre, G., & Loaiza, C. (2015). *La lectura abductiva como estrategia para mejorar niveles de comprensión lectora en estudiantes de décimo de la I. E. Simón Bolívar del municipio de Itagüí* [Master´s dissertations, Universidad de Manizales]. Repositorio institucional de la Fundación Centro Internacional de Educación y Desarrollo Humano. <https://repository.cinde.org.co/handle/20.500.11907/1324>

*Almazán, H. (2018). *Análisis de variables asociadas a la lecto-comprensión en estudiantes de secundaria: hacia una propuesta didáctica* [Bachelor's thesis, Universidad Autónoma del Estado de Morelos]. Repositorio institucional de acceso abierto de la Universidad Autónoma del Estado de Morelos. <http://riaa2.uaem.mx/xmlui/handle/20.500.12055/644>

*Alva, C., Tovar, D., Albornoz, C., Yarlequé, L., & Rodríguez, E. (2010). Aplicación de un programa de estrategias de aprendizaje para incrementar el nivel de comprensión lectora en alumnos del primer ciclo de una universidad particular peruana. *Revista de Investigación de la Universidad Norbert Wiener*, *1*,45-57.

*Amiama-Espaillat, C., & Mayor-Ruiz, C. (2018).  Explorando la relación entre fluidez lectora y competencia lectora en Educación Secundaria. *Ocnos*, *17*(1), 21-31. <https://doi.org/10.18239/ocnos_2018.17.1.1278>

*Angulo, M. (2018). *Los mapas cognitivos para la mejora de la comprensión lectora de los estudiantes del primer grado de Educación Secundaria de la institución educativa parroquial Padre Abad de Tingo María, Huánuco, 2016* [Master´s dissertations, Universidad Católica de los Ángeles Chimbote]. Repositorio institucional de la Universidad Católica los Ángeles de Chimbote. <http://repositorio.uladech.edu.pe/handle/123456789/5101>

*Aran-Filippetti, V., & López, M. (2016). Predictores de la comprensión lectora en niños y adolescentes: el papel de la edad, el sexo y las funciones ejecutivas. *Cuadernos de Neuropsicología*, *10*(1), 23-44. <https://dx.doi.org/10.7714/CNPS/10.1.202>

*Arbaiza, C., Orejuela, B., & Sánchez, A. (2012). *Eficacia del programa para la potenciación del vocabulario y la comprensión (PCV) en el desarrollo del vocabulario receptivo y el nivel de comprensión lectora en estudiantes del primer año de Educación Secundaria* [Master´s dissertations, Pontificia Universidad Católica del Perú]. Repositorio digital de tesis y trabajos de investigación de la Pontificia Universidad Católica del Perú. <https://tesis.pucp.edu.pe/repositorio/handle/20.500.12404/1680>

*Arciniega, M. (2018). *Relación entre la motivación lectora, el desarrollo cognitivo y las estrategias metacognitivas con la comprensión de textos expositivos en estudiantes de un instituto pedagógico nacional de Lima* [Doctoral theses, Universidad Peruana Cayetano Heredia]. Repositorio institucional de la Universidad Peruana Cayetano Heredia. <https://repositorio.upch.edu.pe/handle/20.500.12866/3917>

*Ariza, N., & Bonilla, E. (2014). *Los esquemas mentales como herramienta para la comprensión crítica de textos académicos en la educación superior* [Master´s dissertations, Universidad Libre de Colombia]. Repositorio institucional de la Universidad Libre. <https://repository.unilibre.edu.co/handle/10901/8501>

*Ataucuri, A., & Rojas, A. (2018). *Estrategias metacognitivas y su relación con la comprensión lectora en los estudiantes del cuarto grado de Educación Secundaria en la institución educativa 41008 Manuel Muñoz Nájar, Arequipa* [Bachelor's thesis, Universidad Nacional de San Agustín]. Repositorio institucional de la Universidad Nacional de San Agustín. <http://repositorio.unsa.edu.pe/handle/UNSA/6916>

*Balbi, A., Cuadro, A., & Trías, D. (2009). Comprensión lectora y reconocimiento de palabras. *Ciencias Psicológicas*, *3*(2), 153-160. <https://doi.org/10.22235/cp.v3i2.147>

*Barreyro, J., Injoque-Ricle, I., Álvarez-Drexler, A., Formoso, J., & Burin, D. (2017). Generación de inferencias explicativas en la comprensión de textos expositivos: el rol de la memoria de trabajo y el conocimiento previo específico. *Suma Psicológica*, *24*, 17-24. http://dx.doi.org/[10.1016/j.sumpsi.2016.09.002](http://dx.doi.org/10.1016/j.sumpsi.2016.09.002)

*Benítez, M., Barajas, J., & Hernández, I. (2014). Efecto de la aplicación de una estrategia de comprensión de lectura en un entorno virtual. *Revista Electrónica de Investigación Educativa*, *16*(3), 71-87.

*Benítez, M., Ramírez, J., & Hernández, I. (2014). Efecto de la estrategia de comprensión de la lectura en un entorno virtual en estudiantes de educación superior. *Apertura*, *6*(2), 1-12.

*Blasco, C., & Allueva, P. (2010). La metacomprensión en relación a la comprensión lectora. *Revista de Psicología*, *3*, 721-730. http://dx.doi.org/[10.17060 / ijodaep](http://dx.doi.org/10.17060/ijodaep)

*Briones, D. (2018). *Influencia de la aplicación comparativa de técnicas de comprensión de textos para mejorar la comprensión lectora de las estudiantes del tercer grado de Educación Secundaria de la institución educativa emblemática Santa Teresita, 2016* [Doctoral theses, Universidad Nacional de Cajamarca]. Repositorio institucional de la Universidad Nacional de Cajamarca. <https://repositorio.unc.edu.pe/handle/UNC/2494>

*Broncano, E., & Chávez, E. (2015). *Influencia de las técnicas de lectura en la mejora de la comprensión lectora en los estudiantes del 6° grado de Educación Primaria de la I. E. San Martín de Porres, Marián* [Bachelor's thesis, Universidad Nacional Santiago Antúnez de Mayolo]. Repositorio institucional de la Universidad Nacional Santiago Antúnez de Mayolo. <http://repositorio.unasam.edu.pe/handle/UNASAM/1328>

*Cabanillas, G. (2004). *Influencia de la enseñanza directa en el mejoramiento de la comprensión lectora de los estudiantes de la facultad de ciencias de la educación de UNSCH* [Doctoral theses, Universidad Mayor Nacional de San Marcos]. Repositorio institucional de tesis y trabajos de titulación de la Universidad Mayor Nacional de San Marcos. <https://cybertesis.unmsm.edu.pe/handle/20.500.12672/2371>

*Cabrera, E. (2014). *Procesos y estrategias asociados a la comprensión de textos científicos: evaluación e intervención* [Doctoral theses, Universidad de León]. Repositorio institucional de la Universidad de León. <https://buleria.unileon.es/handle/10612/3679>

*Calderón, M., Chuquillanqui, R., & Valencia, L. (2013). *Las estrategias para la comprensión de textos y los niveles de comprensión lectora en los estudiantes del 4º grado de primaria en la I. E. Nº 0058, UGEL 06, Lurigancho, Chosica, 2013* [Bachelor's thesis, Universidad Nacional de Educación]. Repositorio institucional de la Universidad Nacional de Educación. <https://repositorio.une.edu.pe/handle/UNE/792>

*Calet, N., Defior, S., & Gutierrez-Palma, N. (2015). A cross-sectional study of fluency and reading comprehension in Spanish primary school children. *Journal of Research in Reading*, *38*(3), 272-285. <https://doi.org/10.1111/1467-9817.12019>

*Calet, N., Gutiérrez-Palma, N., & Defior, S. (2017). [Effects of fluency training on reading competence in primary school children: the role of prosody](http://www.sciencedirect.com/science/article/pii/S0959475217302530). *Learning and Instruction*, *52*, 59-68. [https://doi.org/10.1016/j.learninstruc.2017.04.006](https://psycnet.apa.org/doi/10.1016/j.learninstruc.2017.04.006)

*Calet, N., Jiménez-Fernández, G., & Defior, S. (2016). Habilidades fonológicas suprasegmentales y desarrollo lector en niños de Educación Primaria. *Anales de Psicología*, *32*(1), 72-79. <https://doi.org/10.6018/analesps.32.1.216221>

*Calet, N., López-Reyes, R., & Jiménez-Fernández, G. (2019). Do reading comprehension assessment tests result in the same reading profile? A study of Spanish primary school children. *Journal of Research in Reading*, *43*(1), 98-115. <https://doi.org/10.1111/1467-9817.12292>

*Cano, F., García, A., Berbén, A., & Justicia, F. (2014). Science learning: a path analysis of its links with reading comprehension, question-asking in class and science achievement. *International Journal of Science Education*, *36*(10), 1710-1732. <https://doi.org/10.1080/09500693.2013.876678>

*Cano, F., García, A., Justicia, F., & Berbén, A. (2014). Enfoques de aprendizaje y comprensión lectora: el papel de las preguntas de los estudiantes y del conocimiento previo. *Revista de Psicodidáctica*, *19*(2), 247-265. <http://dx.doi.org/10.1387/RevPsicodidact.10186>

*Carriedo, N., & Alonso-Tapia, J. (1996). Main idea comprehension: training teachers and effects on students. *Journal of Research of Reading*, *19*(2), 128-152. <https://doi.org/10.1111/j.1467-9817.1996.tb00093.x>

*Cerdán, R., Gilabert, R., & Vidal-Abarca, E. (2010). Estrategias de selección de información en tareas de contestación a preguntas. *Infancia y Aprendizaje*, *33*(4), 449-460. <https://doi.org/10.1174/021037010793139626>

*Cerrón, A., & Pineda, M. (2014). Estrategias metacognitivas y comprensión lectora en estudiantes universitarios. *Horizonte de la Ciencia*, *4*(6), 97-102. <https://doi.org/10.17162/au.v9i1.348>

*Chino, B., & Zegarra-Valdivia, J. (2019). Implicancia de las funciones ejecutivas “frías y calientes” en la comprensión lectora, en una muestra de estudiantes universitarios peruanos. *Psicología, Conocimiento y Sociedad*, *9*(1), 59-82. <http://dx.doi.org/10.26864/pcs.v9.n1.7>

*Craig, I., Moreno-Pérez, F., Rodríguez-Ortiz, I., Valdés-Coronel, M., & Saldaña, D. (2020). The effects of morphological and syntactic knowledge on reading comprehension in Spanish speaking children. *Reading and Writing*, *33*, 329-348. [https://doi.org/10.1007/s11145-019-09964-5](https://psycnet.apa.org/doi/10.1007/s11145-019-09964-5)

*Cuadro, A., Balbi, A., & Luis, A. (2017). Acceso léxico y lectura de textos en estudiantes universitarios. *Revista Electrónica de Investigación Educativa*, *19*(4), 1-8. <https://doi.org/10.24320/redie.2017.19.4.1282>

*del Pozo, M.  (2018). *La incidencia de las estrategias de comprensión lectora en el éxito de la lectura en Educación Primaria* [Bachelor's thesis, Universidad del País Vasco]. Repositorio institucional de la Universidad del País Vasco. <https://addi.ehu.es/handle/10810/31764>

*Demagistri, M. (2016). *Comprensión lectora, memoria de trabajo, procesos inhibitorios y flexibilidad cognitiva en adolescentes de 12 a 17 años de edad* [Doctoral theses, Universidad Nacional de Mar del Plata]. Repositorio institucional del Consejo Nacional de Investigaciones Científicas y Técnicas. <https://ri.conicet.gov.ar/handle/11336/112488>

*Demagistri, M., Richard’s, M., & Canet, L. (2014). Incidencia del funcionamiento ejecutivo en el rendimiento en comprensión lectora en adolescentes. *Electronic Journal of Research in Educational Psychology*, *12*(2), 343-370. <https://doi.org/10.25115/ejrep.33.13146>

*Doguis, G. (2001). Efectos de diagramas de contenido en la comprensión y retención de textos. *Docencia Universitaria*, *2*(2), 67-96.

*Domínguez, Y. (2015). *El mapa mental y su relación con la capacidad de comprensión lectora de los estudiantes de primer grado de secundaria de la institución educativa Juan Primo Ruiz, Yurimaguas, 2015* [Bachelor's thesis, Universidad César Vallejo]. Repositorio de la Universidad César Vallejo. <https://repositorio.ucv.edu.pe/handle/20.500.12692/23681>

*Elosúa, M., García-Madruga, J., Gómez-Veiga, I., López-Escribano, C., Pérez, E., & Orjales, I. (2012). Habilidades lectoras y rendimiento académico en 3º y 6º de primaria: aspectos evolutivos y educativos. *Estudios de Psicología*, *33*(2), 207-218. <https://doi.org/10.1174/021093912800676411>

*Enciso, R. (2017). *Influencia del programa LECCOMP en el nivel de comprensión lectora de los estudiantes del primer ciclo de la universidad Wiener, 2015* [Doctoral theses, Universidad Nacional de Educación]. Repositorio institucional de la Universidad Nacional de Educación. <https://repositorio.une.edu.pe/handle/UNE/1611>

*Flores, E., & Montes, E. (2015). *Programa “ALE” de comprensión lectora para mejorar la capacidad inferencial de los estudiantes del cuarto grado “B” de Educación Primaria de la institución educativa Santo Tomás de Aquino, distrito de Cerro Colorado, Arequipa, 2015* [Bachelor's thesis, Universidad Nacional de San Agustín]. Repositorio institucional de la Universidad Nacional de San Agustín. <http://repositorio.unsa.edu.pe/handle/UNSA/1955>

*Flores-Carrasco, P., Díaz-Mujica, A., & Lagos-Herrera, I. (2017). Comprensión de textos en soporte digital e impreso y autorregulación del aprendizaje en grupos universitarios de estudiantes de educación. *Revista Electrónica Educare*, *21*(1), 1-17. <https://doi.org/10.15359/ree.21-1.7>

*Fumagalli, J., Barreyro, J., & Jaichenco, V. (2017). Niveles de fluidez lectora y comprensión de textos. *Traslaciones. Revista Latinoamericana de Lectura y Escritura*, *4*(8), 163-186*.*

*García, M. (2013). *Estrategias de aprendizaje, comprensión lectora y rendimiento académico* [Master´s dissertations, Universidad Internacional de La Rioja]. Repositorio digital de la Universidad Internacional de La Rioja. <https://reunir.unir.net/handle/123456789/5318>

*García, R., Bustos, A., & Sánchez, E. (2015). The contribution of knowledge about anaphors, organisational signals and refutations to reading comprehension. *Journal of Research in Reading*, *38*(4), 405-427. <https://doi.org/10.1111/1467-9817.12021>

*García, R., Sánchez, E., Cain, K., & Montoya, J. (2019). Cross-sectional study of the contribution of rhetorical competence to children's expository texts comprehension between third and sixth grade. *Learning and Individual Differences*, *71*, 31-42. <https://doi.org/10.1016/j.lindif.2019.03.005>

*González, A. (1992). *Estrategias metacognitivas en la lectura* [Doctoral theses, Universidad Complutense de Madrid]. Repositorio institucional de la Universidad Complutense de Madrid. <https://eprints.ucm.es/id/eprint/3077/>

*González, M. (1992). *Análisis metacognitivo de la comprensión lectora: un programa de evaluación e intervención en alumnos de enseñanza primaria* [Doctoral theses, Universidad Complutense de Madrid]. Repositorio institucional de la Universidad Complutense de Madrid. <https://eprints.ucm.es/id/eprint/2981/>

*González-Trujillo, M., Calet, N., Defior, S., & Gutiérrez-Palma, N. (2014). Escala de fluidez lectora en español, midiendo los componentes de la fluidez. *Estudios de Psicología*, *35*(1), 104-136. <https://doi.org/10.1080/02109395.2014.893651>

*Guerra, J., & Guevara, C. (2017). Variables académicas, comprensión lectora, estrategias y motivación en estudiantes universitarios. *Revista Electrónica de Investigación Educativa*, *19*(2), 78-90. <https://doi.org/10.24320/redie.2017.19.2.1125>

*Iglesias-Sarmiento, V., Carriedo, N., & Rodríguez, J. (2015). Updating executive function and performance in reading comprehension and problem solving. *Anales de Psicología*, *31*(1), 298-309. <https://doi.org/10.6018/analesps.31.1.158111>

*Infante, M., Coloma, C., & Himmel, E. (2012). Comprensión lectora, comprensión oral y decodificación en escolares de 2º y 4º básico de escuelas municipales. *Estudios Pedagógicos*, *38*(1), 149-160. <http://dx.doi.org/10.4067/S0718-07052012000100009>

*Jiménez, V., Puente, A., Alvarado, J., & Arrebillaga, L. (2009). Medición de estrategias metacognitivas mediante la Escala de conciencia lectora: ESCOLA. *Electronic Journal of Research in Educational Psychology*, *7*(2), 779-804. <https://doi.org/10.25115/ejrep.v7i18.1326>

*Laguna, S., & Trujillo, E. (2004). *Efecto de las estrategias cognitivas y metacognitivas de lectura en la comprensión lectora de los estudiantes de cuarto grado de primaria de la institución educativa Silvia Ruff de Huari, 2014* [Master´s dissertations, Universidad Católica Sedes Sapientiae]. Repositorio institucional digital de la Universidad Católica Sedes Sapientiae. <http://repositorio.ucss.edu.pe/handle/UCSS/562>

*León-Islas, E., May, M., & Chi, J. (2018). Comprensión lectora y medición de fluidez en universitarios de origen maya. *Revista de Investigación Educativa*, *28*, 152-182. <https://doi.org/10.25009/cpue.v0i28.2603>

*López, M., Sanjosé, V., & Solaz, J. (2014). Estructura de conocimiento conceptual, memoria de trabajo y comprensión de textos de ciencias: un estudio con alumnos de secundaria. *Revista Iberoamericana sobre Calidad, Eficacia y Cambio en Educación*, *12*(3), 57-72.

*Malvas, E., & Rodríguez, R. (2014). *Efecto de los organizadores de información en la comprensión lectora en los estudiantes de quinto grado de primaria de la institución educativa N° 86323 Virgen de Fátima de Huari, 2013* [Master´s dissertations, Universidad Católica Sedes Sapientiae]. Repositorio institucional digital de la Universidad Católica Sedes Sapientiae. <http://repositorio.ucss.edu.pe/handle/UCSS/576>

Manrique, G. (2019). *Estrategias innovadoras en la enseñanza de razonamiento verbal en los alumnos del 4º y 5º grado de Educación Secundaria de I. E. P. Jerome Bruner, Arequipa, 2018* [Master´s dissertations, Universidad Nacional de San Agustín]. Repositorio institucional de la Universidad Nacional de San Agustín. <http://repositorio.unsa.edu.pe/handle/UNSA/9134>

*Mañá, A., Vidal-Abarca, E., Domínguez, C., Gil, L., & Cerdán, R. (2009). Papel de los procesos metacognitivos en una tarea de pregunta-respuesta contextos escritos. *Infancia y Aprendizaje*, *32*(4), *553-565.* <https://doi.org/10.1174/021037009789610412>

*Márquez, O. (2014*). Influencia de los mapas mentales en la comprensión lectora de los alumnos de primaria de educación básica regular* [Doctoral theses, Universidad Nacional de Educación]. Repositorio institucional de la Universidad Nacional de Educación. <https://repositorio.une.edu.pe/handle/UNE/552>

*Martín-Antón, J., Marugán, M., Catalina, J., & Carbonero, M. (2013). Estrategias de aprendizaje de elaboración. Entrenamientos y programas. *Aula Abierta*, *41*(1), 49-62.

*Martínez, I. (2012). *Enseñar a leer y escribir para aprender en la Educación Primaria: diseño y evaluación de un programa de intervención de escritura de síntesis a partir de varios textos* [Doctoral theses, Universidad Autónoma de Madrid]. Repositorio institucional de la Universidad Autónoma de Madrid. <https://repositorio.uam.es/handle/10486/11284>

*Martínez, I., Mateos, M., Martín, E., & Rijlaarsdam, G. (2015). Learning history by composing synthesis texts: effects of an instructional programme on learning, reading and writing processes, and text quality. *Journal of Writing Research*, *7*(2), 275-302. <http://dx.doi.org/10.17239/jowr-2015.07.02.03>

*Mateos, M. (1991). Un programa de instrucción en estrategias de supervisión de la comprensión lectora. *Infancia y Aprendizaje*, *56*, 61-76. <https://doi.org/10.1080/02103702.1991.10822315>

*Mateos, M., Solé, I., Martín, E., Castells, N., Cuevas, I., & González-Lamas, J. (2016). Epistemological and reading beliefs profiles and their role in multiple text comprehension. *Electronic Journal of Research in Educational Psychology*, *14*(2), 226-252. <https://doi.org/10.25115/ejrep.39.15058>

*Medina, A. (2001). La señalización y el recuerdo de textos expositivos y su organización. *Tarbiya: Revista de investigación e innovación educativa*,*27*, 77-98.

*Mengual, E. (2017). *Metacomprensión e inteligencia emocional: relación e influencia en la comprensión lectora en alumnado de 5º y 6º de Educación Primaria* [Doctoral theses, Universidad Complutense de Madrid]. Repositorio institucional de la Universidad Complutense de Madrid. <https://eprints.ucm.es/id/eprint/43467/>

*Meza, I. (2004). Efectos del entrenamiento en la estructura del texto sobre la comprensión de la lectura de textos expositivos por parte de estudiantes universitarios. *Anales de la Universidad Metropolitana*, *4*(2), 83-99.

*Montanero, M., & León, J. (2004a). La comprensión de textos multicausales en el área de ciencias sociales. *Revista de Educación*, *333*, 409-424.

*Montanero, M., & León, J. (2004b). Influencia de variables estructurales en la comprensión y recuerdo de textos expositivos. *Revista de Psicología General Aplicada*, *57*(3), 327-342.

*Montanero, M., & González, L. (2003). Estrategias para mejorar la comprensión de textos comparativos.*Revista de Investigación Educativa*,*21*(1), 215-230.

*Morales, S., Verhoeven, L., & van Leeuwe, J (2008). Socio-cultural predictors of reading literacy in fourth graders in Lima, Peru. *Written, Language & Literacy*, *11*(1), 15-34. <https://doi.org/10.1075/wll.11.1.03mor>

*Morales, S., Verhoeven, L., & van Leeuwe, J (2011). Socio-cultural variation in reading comprehension development among fifth graders in Peru. *Reading & Writing*, *24*, 951-969. <https://doi.org/10.1007/s11145-010-9242-2>

*Narváez, N., & Zúñiga, J. (2012). *La técnica de ficha resumen en el mejoramiento de la comprensión lectora de los niños del 4° grado de Educación Primaria de la institución educativa Jorge Chávez de la ciudad de Trujillo* [Bachelor's thesis, Universidad Nacional de Trujillo]. Repositorio institucional de la Universidad Nacional de Trujillo. <https://dspace.unitru.edu.pe/handle/UNITRU/4483>

*Nunura, T. (2018). Estrategias de jerarquización de la información en los niveles de comprensión lectora en estudiantes de ingeniería industrial, Trujillo, 2017. *SCIÉNDO*, *21*(4), 507-513. <https://doi.org/10.17268/sciendo.2018.057>

*Núñez, K. (2017). Dominio semántico y comprensión lectora en estudiantes de la facultad de educación de la universidad nacional Federico Villarreal, Lima, Perú. *CONSENSUS*, *22*(1), 29-35. <https://doi.org/10.33539/consensus.2017.v22n1.990>

*Paba, C., & González, R. (2014). La actividad metacognitiva y la comprensión lectora en estudiantes de décimo grado. *Psicología desde el Caribe*, *31*(1), 79-102.

*Pascual, G., & Goikoetxea, E. (2014). Comprehension of university texts: effects of domain-knowledge and summary. *Reading Psychology*, *35*(2), 101-126. <https://doi.org/10.1080/02702711.2012.664612>

*Pashanasi, J. (2019). *El subrayado y la comprensión lectora en los estudiantes del 1° grado de Educación Secundaria de la institución educativa José María Arguedas, Yurimaguas, 2019* [Bachelor's thesis, Universidad César Vallejo]. Repositorio de la Universidad César Vallejo. <https://repositorio.ucv.edu.pe/handle/20.500.12692/35940>

*Pérez, M. (1990). Análisis experimental y teórico sobre la explicación cognitiva de la comprensión de textos. *Psycothema*, *2*(2), 7-33.

*Pérez, M. (2013). Conocimiento previo y resumen de un texto argumentativo. *Folios*, *37*, 3-15. <https://doi.org/10.17227/01234870.37folios3.15>

*Pizarro, E. (2008). *Aplicación de los mapas mentales en la comprensión lectora en estudiantes del ciclo I de instituciones de educación superior* [Master´s dissertations, Universidad Nacional Mayor de San Marcos]. Repositorio institucional de tesis y trabajos de titulación de la Universidad Nacional Mayor de San Marcos. <https://cybertesis.unmsm.edu.pe/handle/20.500.12672/2385>

*Recio, P., & León, J. (2015). La lectura en un contexto bilingüe: fluidez y comprensión lectora en alumnos de 1º y 4º de primaria. *Psicología Educativa*, *21,* 47-53. <https://doi.org/10.1016/j.pse.2015.03.002>

*Rello, J., Mercader, J., Siegenthaler, R., & Presentación, M. (2018). Funcionamiento ejecutivo y comprensión lectora al finalizar Educación Primaria. *Revista de Psicología*, *1*(1), 367-376. <https://doi.org/10.17060/ijodaep.2018.n1.v2.1243>

*Riffo, B., Reyes, F., Novoa, A., Véliz, M., & Castro, G. (2014). Competencia léxica, comprensión lectora y rendimiento académico en estudiantes de enseñanza media. *Literatura y Lingüística*, *30*, 165-180. http://dx.doi.org/[10.29344 / 0717621X.30.148](http://dx.doi.org/10.29344/0717621X.30.148)

*Rodríguez, B., Calderón, M., Leal, M., & Arias-Velandia, N. (2016). Uso de estrategias metacomprensivas para el fortalecimiento de la comprensión lectora en estudiantes de segundo ciclo de un colegio oficial en Bogotá, Colombia. *Folios*, *44*, 93-108. http://dx.doi.org/[10.17227 / 01234870.44folios93.108](http://dx.doi.org/10.17227/01234870.44folios93.108)

*Salazar, D., & Vélez, M. (2017). *Efecto de la interrogación metacognitiva en los niveles de comprensión lectora en los estudiantes de 5º de Educación Básica Primaria* [Master´s dissertations, Universidad de la Costa]. Repositorio Universidad de la Costa. <https://repositorio.cuc.edu.co/handle/11323/85>

*Salinas, J. (2010). *Efectos de un programa de comprensión lectora en estudiantes de cuarto de primaria de una institución educativa del Callao* [Master´s dissertations, Universidad San Ignacio de Loyola]. Repositorio institucional de la Universidad San Ignacio de Loyola. <http://repositorio.usil.edu.pe/handle/123456789/1304>

*Sánchez, E., & García, R. (2009). The relation of knowledge of textual integration devices to expository text comprehension under different assessment conditions. *Reading and Writing*, *22*, 1081-1108. <https://doi.org/10.1007/s11145-008-9145-7>

*Sánchez, E., García, R., & Bustos, A. (2017). Does rhetorical competence moderate the effect of rhetorical devices on the comprehension of expository texts beyond general comprehension skills? *Reading and Writing*, *30*, 439-462. <https://doi.org/10.1007/s11145-016-9684-2>

*Sánchez, E., García, R., & González, A. (2007). Can differences in the ability to recognize words cease to have an effect under certain reading conditions? *Journal of Learning Disabilities*, *40*(4), 290-305. [https://doi.org/10.1177/00222194070400040101](https://doi.org/10.1177%2F00222194070400040101)

*Sánchez, E., González, A., & García, R. (2002). Competencia retórica. Una propuesta para interpretar las dificultades de comprensión. *Psicothema*, *14*(1), 77-85.

*Sánchez, M. (2019). *Programa de estrategias metacognitivas para mejorar la comprensión lectora en los estudiantes de sexto grado de Educación Primaria de la I. E. Nº 10011 del distrito de José Leonardo Ortiz, Chiclayo, 2019* [Bachelor's thesis, Universidad Católica los Ángeles de Chimbote]. Repositorio institucional de la Universidad Católica los Ángeles de Chimbote. <http://repositorio.uladech.edu.pe/handle/123456789/16388>

*Sanjosé, V., Fernández, J., & Vidal-Abarca, E. (2010). Importancia de las destrezas de procesamiento de la información en la comprensión de textos científicos. *Infancia y Aprendizaje*, *33*(4), 529-541. <https://doi.org/10.1174/021037010793139581>

*Soto, C., Gutiérrez, A., Carrasco, M., & Contreras, M. (2020). The role of meta-cognitive cues on the comprehension of proficient and poor readers. *UKLA John Wiley & Sons*, 1-18. <https://doi.org/10.1111/1467-9817.12303>

*Soto, C., Gutiérrez, A., Jacovina, M., McNamara, D., Benson, N., y Riffo, B. (2019). Reading comprehension and metacognition: the importance of inferential skills. *Cogent Education*, *6*, 1-20. <https://doi.org/10.1080/2331186X.2019.1565067>

*Soto, C., Gutiérrez, A., Rodríguez, M., Asún, R., Figueroa, M., & Serrano, M. (2019). Impact of bridging strategy and feeling of knowing judgments on reading comprehension using COMPRENDE: an educational technology. *TechTrends*, *63*, 570-582. <https://doi.org/10.1007/s11528-019-00383-5>

*Suárez, A., Moreno, J., & Godoy, M. (2010). Vocabulario y comprensión lectora: algo más que causa y efecto. *Álabe: Revista de Investigación sobre Lectura y Escritura*, *1*, 1-18. http://dx.doi.org/[10.15645 / Alabe.2010.1.7](http://dx.doi.org/10.15645/Alabe.2010.1.7)

*Tapia, M. (2017). *Estrategias cognitivas en la comprensión lectora en los estudiantes de sexto grado de Educación Primaria de la institución educativa Nº 41042 Pedro José Tordoya Montoya del distrito de Caravelí, provincia de Caravelí, Arequipa* [Bachelor's thesis, Universidad Nacional de San Agustín]. Repositorio institucional de la Universidad Nacional de San Agustín. <http://repositorio.unsa.edu.pe/handle/UNSA/4603>

*Testa, S. V. (2009). *Lectura y escritura en alumnos del último año del ex nivel polimodal: estrategias de intervención* [Bachelor's thesis, Universidad Nacional de La Plata]. Repositorio memoria académica. <http://www.memoria.fahce.unlp.edu.ar/library?a=d&c=tesis&d=Jte786>

*Thorne, C., Morla, K., Uccelli, P., Nakano, T., Mauchi, B., Landeo, L., Vásquez, A., & Huerta, R. (2013). Efecto de una plataforma virtual en comprensión de lectura y vocabulario: una alternativa para mejorar las capacidades lectoras en primaria. *Revista de Psicología*, *31*(1), 1-35.

*Torres, R. (2007). *Efecto del uso de estrategias de aprendizaje y autorregulación para mejorar el nivel de comprensión de textos expositivos de ciencias sociales* [Master´s dissertations, Universidad Católica Andrés Bello]. Biblioteca virtual de la Universidad Católica Andrés Bello <http://biblioteca2.ucab.edu.ve/anexos/biblioteca/marc/texto/AAQ9529.pdf>

*Ugaz, I. (2019). *Técnicas de síntesis para mejorar la comprensión lectora de los estudiantes del segundo grado de Educación Secundaria de la institución educativa Shucshuyacu, distrito de Jepelacio, provincia de Moyobamba, 2018* [Bachelor's thesis, Universidad Nacional de San Martín]. Repositorio institucional digital de la Universidad Nacional de San Martín. <http://repositorio.unsm.edu.pe/handle/11458/3541>

*Ureta, M. (2018). *Aplicación del programa de la metacomprensión para mejorar la comprensión lectora en estudiantes del primer ciclo de la especialidad de educación inicial de la universidad nacional de educación Enrique Guzmán y Valle* [Master´s dissertations, Universidad Nacional de Educación]. Repositorio institucional de la Universidad Nacional de Educación. <https://repositorio.une.edu.pe/handle/UNE/2780>

*Vásquez, C. (2016). *Implementación y aplicación de estrategias educativas para mejorar los niveles de comprensión lectora en los alumnos de 4° grado de Educación Secundaria de la institución educativa parroquial San Ricardo del Distrito de la Victoria, Lima, 2014* [Bachelor's thesis, Universidad Católica los Ángeles de Chimbote]. Repositorio institucional de la Universidad Católica los Ángeles de Chimbote. <http://repositorio.uladech.edu.pe/handle/123456789/3800>

*Vega, N., Bañales, G., Reyna, A., & Pérez, E. (2014). Enseñanza de estrategias para la comprensión de textos expositivos con alumnos de sexto grado de primaria. *Revista Mexicana de Investigación Educativa*, *19*(63), 1047-1068.

*Vidal-Abarca, E. (1990). Un programa para la enseñanza de la comprensión de ideas principales de textos expositivos. *Infancia y Aprendizaje*,*49*, 53-72. <https://doi.org/10.1080/02103702.1990.10822257>

*Vidal-Abarca, E., & Gilabert, R. (1995). Teaching strategies to create visual representations of key ideas in content area text materials: a longterm intervention inserted in school curriculum. *European Journal of Psychology Education*,*10*, 433-447. <https://doi.org/10.1007/BF03172931>

*Vidal-Abarca, E., Gilabert, R., Ferrer, A., Ávila, V., Martínez, T., Mañá, A., Llorens, A. C., Gil, L., Cerdán, R., Ramos, L., & Serrano, M. A. (2014). TuinLEC, un tutor inteligente para mejorar la competencia lectora. *Infancia y Aprendizaje*, *37*(1), 25-56. <https://doi.org/10.1080/02103702.2014.881657>

*Vidal-Abarca, E., Mañá, A., & Gil, L. (2010). Individual differences for self-regulating task-oriented reading activities. *Journal of Educational Psychology*, *102*(4), 817-826. [https://doi.org/10.1037/a0020062](https://psycnet.apa.org/doi/10.1037/a0020062)

*Vieiro, P., & Amboage, I. (2016). Relación entre habilidades de lectura de palabras y comprensión lectora. *Revista de Investigación en Logopedia*, *1*, 1-21. <https://doi.org/10.5209/rlog.58552>

*Villalonga, M. (2012). *Comprensión lectora en niños de escolaridad primaria de San Miguel de Tucumán que viven en contextos de pobreza* [Master´s dissertations, Universidad Autónoma de Argentina]. Repositorio Dspace. <http://hdl.handle.net/10469/4595>

*Villalonga, M., Padilla, C., & Burín, D. (2014). Relaciones entre descodificación, conocimiento léxico-semántico e inferencias en niños de escolaridad primaria. *Interdisciplinaria*, *31*(2), 259-274. http://dx.doi.org/[10.16888 / interd.2014.31.2.5](http://dx.doi.org/10.16888/interd.2014.31.2.5)

*Zárate, M. (2006). *Influencia de la aplicación de una propuesta pedagógica en el mejoramiento de las estrategias de aprendizaje y la comprensión lectora de estudiantes de la carrera de educación primaria del INSSB* [Master´s dissertations, Universidad Mayor de San Andrés]. Repositorio institucional Universidad Mayor de San Andrés. <https://repositorio.umsa.bo/handle/123456789/10633>

*Zevallos, D., Arcos, N., & Ripoll, J. (2017). La concepción simple de la lectura en alumnos de 4º de primaria de una escuela fiscal de Quito. *Alteridad*, *12*(1), 115-122. <http://dx.doi.org/10.17163/alt.v12n1.2017.10>
